1 Title page

2 **Cortical entrainment to hierarchical contextual rhythms**  
3 **recomposes dynamic attending in visual perception**

4 Peijun Yuan<sup>1,2</sup>, Ruichen Hu<sup>1,2</sup>, Xue Zhang<sup>1,2</sup>, Ying Wang<sup>1,2\*</sup>, Yi Jiang<sup>1,2\*</sup>

5 <sup>1</sup>State Key Laboratory of Brain and Cognitive Science, CAS Center for Excellence in Brain  
6 Science and Intelligence Technology, Institute of Psychology, Chinese Academy of Sciences,  
7 16 Lincui Road, Beijing 100101, P. R. China

8 <sup>2</sup>Department of Psychology, University of Chinese Academy of Sciences, 19A Yuquan Road,  
9 Beijing 100049, P. R. China

10 \*For correspondence: [wangying@psych.ac.cn](mailto:wangying@psych.ac.cn); [yijiang@psych.ac.cn](mailto:yijiang@psych.ac.cn)

11

12 **Abstract**

13 Temporal regularity is ubiquitous and essential to guiding attention and coordinating  
14 behavior within a dynamic environment. Previous researchers have modeled attention as  
15 an internal rhythm that may entrain to first-order regularity from rhythmic events to  
16 prioritize information selection at specific time points. Using the attentional blink  
17 paradigm, here we show that higher-order regularity based on rhythmic organization of  
18 contextual features (pitch, color, or motion) may serve as a temporal frame to recompose  
19 the dynamic profile of visual temporal attention. Critically, such attentional reframing  
20 effect is well predicted by cortical entrainment to the higher-order contextual structure at  
21 the delta band as well as its coupling with the stimulus-driven alpha power. These results  
22 suggest that the human brain involuntarily exploits multiscale regularities in rhythmic  
23 contexts to recompose dynamic attending in visual perception, and highlight neural  
24 entrainment as a central mechanism for optimizing our conscious experience of the world  
25 in the time dimension.

26

## 27 **Introduction**

28 Deploying attention over time is crucial for guiding human activities within a rapidly  
29 changing environment. However, the constant influx of information goes far beyond our  
30 mental capacity, impeding even the most competent human brain from capturing every  
31 nuance of the details. How does the human brain surmount such limitations in temporal  
32 attention allocation during dynamic information processing?

33 One feasible solution, as that for spatial attention, is through selection, or by shining  
34 an attentional “spotlight” on the most relevant information while filtering out the  
35 irrelevant regarding the task demands (Posner, 1980). When it comes to the temporal  
36 domain, people tend to utilize regularities in the sensory information flow for directing  
37 attention to the moments when a target event is expected to occur (Nobre et al., 2007;  
38 Nobre & van Ede, 2018). As a great example, Jones and colleagues have shown in a series  
39 of studies that after listening to a rhythmic tone sequence, auditory perception in terms  
40 of pitch judgment and time discrimination was more accurate for target tones appearing  
41 at the expected than the unexpected time points (Jones et al., 2002; Large & Jones, 1999).  
42 Such facilitation effects have been extended to various aspects of visual perception and  
43 even across sensory modalities (Bolger et al., 2014; Brochard et al., 2013; Mathewson et  
44 al., 2010; Miller et al., 2013; ten Oever et al., 2014), implicating the involvement of a  
45 general attentional selection mechanism guided by the regularity in stimulus timing.

46 In this line of studies, perceptual responses were significantly improved for targets  
47 appearing within a rhythmic context but not within an arrhythmic context. These findings  
48 can be interpreted by the dynamic attending theory (DAT), which assumes attention as an  
49 internal oscillatory activity (or attending rhythm) that can be entrained to rhythmic  
50 structures of the exogenous events (Jones, 1976; Jones et al., 1981; Jones & Boltz, 1989;  
51 Large & Jones, 1999). In line with this assumption, electrophysiological research in  
52 humans and non-human primates have found entrainment of intrinsic neural oscillations  
53 to external stimulus rhythms, and regarded such process as an instrument for selective  
54 attention (Calderone et al., 2014; Obleser & Kayser, 2019; Schroeder & Lakatos, 2009).  
55 Through neural entrainment, neuronal excitability aligns with the occurrence of rhythmic

56 events, creating “temporal attentional spotlights” that attract the brain’s attentional  
57 resources towards a string of selected moments (Calderone et al., 2014; Henry &  
58 Herrmann, 2014; Lakatos et al., 2008, 2013; Schroeder & Lakatos, 2009).

59 The synchronization between the internal attending rhythm and the external  
60 rhythms allows us to direct attention proactively and enhance perception at the  
61 anticipated moments. With regards to forming a coherent perception of the dynamic  
62 environment, however, we should not only select information bound to the anticipated  
63 time points, but also allocate attentional resources among these points, raising the  
64 problem of dynamic attentional deployment over an information stream. For instance,  
65 when viewing a rapid serial visual presentation (RSVP) stream, there is a large chance that  
66 the observer would miss the second of two temporally proximate targets, as the allocation  
67 of attention to the first target hinders the redeployment of mental resources to the second  
68 one (Broadbent & Broadbent, 1987). This phenomenon, vividly referred to as the  
69 attentional blink (AB)(Chun & Potter, 1995; Raymond et al., 1992), has attracted much  
70 interest as it reveals the limitations of attentional allocation and memory processes that  
71 may become a bottleneck for conscious awareness (Dux & Marois, 2009; Martens & Wyble,  
72 2010; Shapiro et al., 1997). More intriguingly, as items in the RSVP stream are all  
73 rhythmically presented and temporally predictable, the AB effect poses a challenge in  
74 dynamic attending that cannot be circumvented solely by the anticipation built upon  
75 stimulus timing.

76 To address this challenge, here we propose that, the brain has to rely, as a  
77 complement to the first-order regularity in rhythmic stimulation, on regularities in the  
78 higher-order temporal structure of the information stream. More specifically, if the  
79 endogenous attentional rhythm could entrain automatically not only to the stimulus  
80 rhythm but also to the higher-order structure based on the information content, the  
81 deployment of temporal attention might be reconstructed in a way that facilitates target  
82 detection in the AB task. To test this hypothesis, we synchronized the original AB stream  
83 (stimulation rate at 10 Hz) to a hierarchical contextual stream that possessed a feature-  
84 based temporal structure—a 2.5Hz rhythm arising from periodic changes of a physical  
85 feature, superimposed on its stimulus rhythm at 10Hz. Using temporal structures defined

86 by a variety of features (pitch, color, etc.), we provided converging evidence that the  
87 structured context, which was task-irrelevant and even from a different modality, could  
88 regulate the dynamic deployment of visual attention so as to alleviate the AB effect. To  
89 further unravel the neural basis of the observed attentional modulation effect, we  
90 conducted an electroencephalogram (EEG) experiment. We are particularly interested in  
91 whether neural oscillations can entrain to the contextual temporal structure of stimulus  
92 feature along with that of stimulus onset timing, and more critically, whether and how the  
93 cortical entrainment to these hierarchical structures mediates the behavioral modulation  
94 effect.

## 95 **Results**

### 96 **Temporal structure of contextual auditory stream recomposes visual attentional** 97 **deployment**

98 In Experiment 1a, we first explored whether feature-defined temporal structure from a  
99 contextual auditory stream could regulate visual attentional deployment during the AB  
100 task. If so, the AB effect should be modulated by the positions of the visual targets relative  
101 to the rhythmic structure arising from periodic changes of the background sounds (Fig.  
102 1A). Above all, we found a robust AB effect in the short-SOA conditions, no matter whether  
103 there were contextual sounds or not. The T2 detection accuracy conditioned on correct  
104 T1 response was generally impaired in the short-SOA conditions relative to that in the  
105 long-SOA condition, during both the context session (long-SOA:  $0.945 \pm 0.016$  (mean  $\pm$  se),  
106 short-SOA:  $0.728 \pm 0.034$ ,  $t(15) = 5.443$ ,  $p < .001$ , Cohen's  $d = 1.361$ ) and the baseline  
107 session (long-SOA:  $0.950 \pm 0.013$ , short-SOA:  $0.702 \pm 0.034$ ,  $t(15) = 6.720$ ,  $p < .001$ ,  
108 Cohen's  $d = 1.680$ ).

109 More importantly, looking close at T2 performance in the short-SOA conditions (Fig.  
110 1B), we found T2 was better identified when two targets appeared in two adjacent cycles  
111 (between-cycle condition) than within the same cycle defined by the background sounds  
112 (within-cycle condition). Notably, such difference was observed only for the context  
113 session ( $t(15) = 2.947$ ,  $p = .010$ , Cohen's  $d = 0.737$ ) but not for the baseline (no sound)  
114 session ( $t(15) = -0.212$ ,  $p = .835$ , Cohen's  $d = 0.053$ ), although the target positions were

115 completely matched between these two sessions. Meanwhile, only in the between-cycle  
116 condition, the contextual sounds enhanced T2 detection accuracy relative to the baseline  
117 ( $t(15) = 2.287, p = .037, \text{Cohen's } d = 0.572$ ), while in the within-cycle condition, the  
118 performance kept comparable between the context and baseline sessions ( $t(15) = -0.271,$   
119  $p = .790, \text{Cohen's } d = 0.068$ ). The observed dissociation was further confirmed by a two-  
120 way repeated-measures ANOVA, which yielded a significant interaction between  
121 experimental session (baseline vs. context session) and target position (between- vs.  
122 within-cycle, defined by the context) ( $F(1, 15) = 7.151, p = .017, \eta_p^2 = .323$ ).

123 Results from Experiment 1a demonstrated that feature-based temporal structure of  
124 an auditory stream, though being task-irrelevant, could systematically modulate the  
125 allocation of visual attention over the AB stream. Since the temporal structure of the  
126 contextual sounds was defined by periodic change of pitch, when two targets were located  
127 in distinct cycles as in the between-cycle condition, they were accompanied by different  
128 tones, in contrast to that when located within the same cycle they were accompanied by  
129 the same tone. It is possible that the contrast of physical stimulation (i.e., pitch) at T1 and  
130 T2 could account for the performance improvement in the between-cycle condition. To  
131 test this possibility, in Experiment 1b, we matched the pitch of tones at target occurrence  
132 with that in Experiment 1a for the between- and within-cycle condition respectively,  
133 whereas disrupted feature-based regularity in the temporal structure of the contextual  
134 sound sequence (Fig. 1A, bottom). Despite that the sounds paired with the targets were  
135 exactly the same as in Experiment 1a, the difference in T2 detection accuracy caused by  
136 the contextual sounds was no longer observed ( $t(15) = 0.433, p = .671, \text{Cohen's } d = 0.108$ ),  
137 neither was its interaction with experimental session ( $F(1, 15) = 2.734, p = .119, \eta_p^2 = .154$ ;  
138 Fig. 1C). In other words, T2 was identified with similar accuracy across all the conditions  
139 in Experiment 1b, suggesting that it is the temporal structure of the contextual sounds,  
140 not the pitch difference at target presentation, that accounts for the between-cycle  
141 facilitation effect observed in Experiment 1a.

142

### 143 **Generalization of the modulation effect to different cycle frequencies**

144 In Experiment 1a, the auditory context always changed its pitch value every four items,  
145 i.e., every 400 ms as one cycle, resulting in rhythmic cycles at 2.5 Hz. In Experiment 1c, we  
146 tested whether the modulation effect we observed could be generalized to other cycle  
147 frequencies. We set the pitch change rate to 2 Hz (i.e., five items per cycle; Fig. 2A, upper)  
148 and 3.3 Hz (i.e., three items per cycle; Fig. 2A, lower). For both context frequencies, the T2  
149 detection performance in the between-cycle condition was significantly higher than that  
150 in the within-cycle condition (Fig. 2B; for 2 Hz,  $t(15) = 3.478$ ,  $p = .004$ , Cohen's  $d = 0.869$ ;  
151 for 3.3 Hz,  $t(15) = 2.467$ ,  $p = .030$ , Cohen's  $d = 0.617$ ), suggesting successful attentional  
152 modulation effects. Furthermore, a repeated-measures ANOVA on T2 accuracy revealed  
153 only a significant main effect of relative target position (i.e., between- vs. within-cycle)  
154 ( $F(1, 15) = 23.320$ ,  $p < .001$ ,  $\eta_p^2 = .609$ ), with a marginally significant main effect of  
155 frequency ( $F(1, 15) = 4.337$ ,  $p = .055$ ,  $\eta_p^2 = .224$ ) and no interaction between these two  
156 factors ( $F(1, 15) = 0.204$ ,  $p = .658$ ,  $\eta_p^2 = 0.013$ ).

### 157 **The effect of temporal attention rather than perceptual grouping**

158 As temporal structure of the context was constructed by auditory items sharing the same  
159 feature (i.e., pitch), one may argue that perceptual grouping on the basis of similarity  
160 (Bregman, 1994), instead of dynamic attending guided by feature-based temporal  
161 regularities, contributes to the between-cycle benefit that we observed. To disentangle  
162 these factors, in Experiment 1d, we changed the pitch value of tone sequences irregularly  
163 to form auditory streams that could be grouped in varying lengths (Fig. 2C, upper).  
164 Though temporal grouping was reserved in this setting, no facilitation effect was observed  
165 when targets were separated in two distinct groups relative to when they were displayed  
166 within the same group (Fig. 2D, Irreg-G). T2 detection performance was comparable in the  
167 between- and the within-group conditions ( $t(15) = 0.348$ ,  $p = .733$ , Cohen's  $d = 0.087$ ).

168 Compared with Experiments 1a and 1c, the strength of temporal grouping in  
169 Experiment 1d might be attenuated due to irregular number of items in each group, which  
170 could lead to the lack of behavioral modulation effect. To solve this issue, in Experiment  
171 1e (Fig. 2C, lower), we changed the pitch every four items to keep the rule of temporal

172 grouping exactly the same as that in Experiment 1a. Nevertheless, we disrupted the  
173 regularity of stimulus timing. Such manipulation would have a detrimental impact on  
174 dynamic deployment of temporal attention in general, according to the basic assumption  
175 of the DAT (Jones et al., 1982; Jones & Boltz, 1989; Large & Jones, 1999). On the other hand,  
176 it would have little influence on the grouping effect. Therefore, if temporal attention rather  
177 than perceptual grouping is essential to the behavioral modulation effect observed in the  
178 current study, we should expect such effect to disappear in Experiment 1e. In line with our  
179 speculation, when the stimulus onset timing was randomized, T2 detection performance  
180 in the between-cycle condition was no longer improved relative to the within-cycle  
181 condition (Fig. 2D, Irreg-T;  $t(15) = 0.302$ ,  $p = .767$ , Cohen's  $d = 0.076$ ), despite the potential  
182 benefit of the grouping effect. Putting together, the absence of context-induced  
183 modulation effect in Experiments 1d and 1e consistently supports the idea that temporal  
184 grouping without dynamic attending guided by feature- and timing-related regularities in  
185 the auditory context is insufficient to cause the behavioral modulation effect.

### 186 **Temporal regularities in color-defined rhythmic structure recompose visual** 187 **attentional deployment**

188 Information from the auditory modality, like speech and music, is inherently organized in  
189 time and provides rich sources of rhythmic structures that can be proactively tracked by  
190 the human brain (Arnal & Giraud, 2012; Doelling & Poeppel, 2015; Haegens & Zion  
191 Golumbic, 2018; Zion Golumbic et al., 2012). This suggests a possibility that the role of  
192 rhythmic structure in guiding attention is exclusive to auditory context, which may explain  
193 the findings from Experiment 1 that temporal structures generated by rhythmic changes  
194 of auditory signals in the background automatically modulate the AB effect. To test this  
195 idea, we designed Experiment 2 to directly investigate whether temporal structures based  
196 on the change of visual properties would exert a similar influence on temporal attentional  
197 deployment. In Experiment 2a, we used visual patterns with periodic change in  
198 background color as the temporal context while observers were performing the same AB  
199 task (Fig. 3A). As a control experiment, Experiment 2b followed the same logic for  
200 Experiment 1b, in which we destroyed the structure of the visual context by changing the



201 background color in random orders, but kept the background color presented with the  
202 targets the same as that in Experiment 2a (Fig. 3C).

203 Similar to findings obtained from Experiment 1a, the interaction between  
204 experimental session (baseline vs. context session) and target position (between- vs.  
205 within-cycle) was significant in Experiment 2a (Fig. 3B;  $F(1, 15) = 5.180, p = .038, \eta_p^2$   
206  $= .257$ ). In the context session only, T2 performance in the between-cycle condition was  
207 better than that in the within-cycle condition ( $t(15) = 3.538, p = .003, \text{Cohen's } d = 0.885$ ).  
208 Compared with the baseline session, T2 performance was only improved in the between-  
209 cycle condition ( $t(15) = 2.274, p = .038, \text{Cohen's } d = 0.569$ ). By contrast, in Experiment 2b,  
210 we did not observe a significant facilitation effect in the between-cycle condition  
211 compared with the within-cycle condition ( $t(15) = -1.176, p = .258, \text{Cohen's } d = 0.294$ ) or  
212 with its counterpart in the baseline session ( $t(15) = 0.685, p = .504, \text{Cohen's } d = 0.171$ ),  
213 nor did we observe the interaction between experimental session and target position (Fig.  
214 3D;  $F(1, 15) = 1.435, p = .250, \eta_p^2 = .087$ ). These findings suggest that the utilization of  
215 feature-based temporal regularities in attentional guidance is a fundamental principle  
216 that holds true not only for auditory but also for visual processing.

### 217 **Excluding the impact of structure boundary: evidence from motion context**

218 So far, results from Experiments 1 and 2 have demonstrated a general regulatory effect  
219 that feature-based temporal structure from task-irrelevant information recomposed  
220 visual attentional allocation during the AB task, which could be exerted within the same  
221 or cross different sensory modalities. In both experiments, however, the switch from one  
222 feature-based rhythmic cycle to another was always accompanied by an abrupt change in  
223 physical features (pitch or color), resulting in explicit boundaries before T2 presentation  
224 in the between-cycle but not in the within-cycle condition. This abrupt change may serve  
225 as an attentional cue or alerting signal for the upcoming T2, and thus accounts for the  
226 improvement of performance in the between-cycle condition. To examine this possibility,  
227 in Experiment 3, we introduced a cyclic motion context that possessed feature-based  
228 rhythmicity identical to those contextual rhythms in previous experiments (for more  
229 details, see Methods) but had no abrupt boundaries between cycles (Fig. 3E). Once again,

230 we observed significant improvement of T2 performance in the between-cycle condition  
231 relative to the within-cycle condition in the cyclic motion session (Fig. 3F;  $t(15) = 2.674$ ,  $p$   
232  $= .017$ , Cohen's  $d = 0.669$ ), but this was not the case in the random motion session ( $t(15)$   
233  $= -0.330$ ,  $p = .746$ , Cohen's  $d = 0.082$ ), resulting in a significant interaction between  
234 experimental session (baseline vs. context session) and target position (between- vs.  
235 within-cycle):  $F(1, 15) = 9.253$ ,  $p = .008$ ,  $\eta_p^2 = 0.382$ . These results provide compelling  
236 evidence that explicit perceptual boundaries are not necessary for the temporal structure  
237 in the context to regulate the allocation of attentional resources.

### 238 **EEG experiment: The role of neural entrainment in regulating attentional** 239 **deployment**

240 *Neural tracking of higher-order temporal structure of contextual rhythms predicts the*  
241 *behavioral modulation effect*

242 To investigate the neural mechanisms underlying the observed context-induced effect, we  
243 carried out an EEG experiment using the same task as that in Experiment 1a. First of all,  
244 we replicated the behavioral modulation effect that T2 performance was significantly  
245 better in the between-cycle condition versus the within-cycle condition, only in the  
246 context session (between-cycle:  $0.567 \pm 0.036$ , within-cycle:  $0.520 \pm 0.039$ ,  $t(15) = 3.838$ ,  
247  $p = .002$ , Cohen's  $d = 0.960$ ) but not in the baseline session (between-cycle:  $0.519 \pm 0.039$ ,  
248 within-cycle:  $0.527 \pm 0.043$ ,  $t(15) = 0.296$ ,  $p = .771$ , Cohen's  $d = 0.074$ ). Furthermore, to  
249 identify the oscillatory characteristics of EEG signals in response to stimulus rhythms, we  
250 examined the FFT spectral peaks by subtracting the mean power of two nearest  
251 neighboring frequencies from the power at the stimulus frequency. Power spectrum in Fig.  
252 4A shows several peaks for the context session, with the highest at 10 Hz (compared with  
253 zero using one-sample  $t$ -test, right-tailed,  $t(15) = 10.610$ ,  $p < .001$ , FDR-corrected for  
254 multiple comparisons across frequencies) corresponding to the common stimulation  
255 frequency of the visual and auditory streams. More importantly, the second-highest peak  
256 appeared at 2.5 Hz ( $t(15) = 5.730$ ,  $p < .001$ , FDR-corrected), followed by its harmonics at  
257 5 and 7.5 Hz, indicating neural tracking of the feature-defined structure of the auditory  
258 context. In contrast with the observation in the context session, we only found significant

259 power peak at 10 Hz ( $t(15) = 9.405, p < .001$ , FDR-corrected), but not at 2.5 Hz ( $t(15) =$   
260  $0.301, p = .384$ , FDR-corrected) in the baseline session where contextual rhythms were  
261 absent, and the power at 2.5 Hz was significantly weaker than that in the context session  
262 ( $t(15) = 3.421, p = .002$ , FDR-corrected).

263 The significant enhancement of EEG power at 2.5 Hz clearly demonstrates that the  
264 brain can entrain to the higher-order structure defined by changes in an auditory feature  
265 (i.e. pitch) of the contextual stream. Consistent with previous studies, we also observed a  
266 wide range of individual variation in such cortical tracking of contextual rhythms (Grahn  
267 & McAuley, 2009; Kranczioch, 2017; Nozaradan et al., 2016). Could such variation predict  
268 one's ability to extract and utilize the feature-based structure at the neural level, and thus  
269 explain the individual differences in the attentional modulation effect? To explore this  
270 possibility, we calculated the Pearson correlation between the magnitude of the neural  
271 entrainment effect and the behavioral modulation index (BMI) using a cluster-based  
272 permutation test. In the context session, we identified two significant clusters showing  
273 positive correlation between power at 2.5 Hz and individuals' behavioral effect—one in  
274 the parieto-occipital region (Fig. 4B; P5, PO7, PO5, PO3;  $r = .587, p = .008$ , right-tailed) and  
275 the other in the frontal area (F3, F1, FZ, FC3, FC1, FCZ, C1, CZ;  $r = .681, p = .002$ ). By contrast,  
276 no significant clusters were found in the baseline session ( $p > .05$ ).

277 To further examine the role of brain activity phase-locked with the rhythmic context,  
278 we also analyzed the inter-trial phase coherence (ITPC) of EEG signals. Consistent with  
279 the power spectrum, ITPC in the context session peaked at 2.5 and 10 Hz (Fig. 4C),  
280 suggesting a hierarchical entrainment effect elicited by both feature-based and time-  
281 based regularities. By contrast, ITPC in the baseline session only peaked at 10 Hz,  
282 mirroring the stimulation rate of the visual stream, and the ITPC at 2.5 Hz was significantly  
283 weaker than that in the context session ( $t(15) = 4.652, p < .001$ , FDR corrected). Critically,  
284 only in the context session, the 2.5 Hz ITPC was positively correlated with the behavioral  
285 modulation index, yielding two significant clusters in the parieto-occipital area (Fig. 4D;  
286 P7, P5, PO7, PO5, PO3, O1:  $r = .612, p = .006$ ) and the frontal area (FPZ, FP2, AF4, F2, F4,  
287 F6;  $r = .672, p = .002$ ). Taken together, the results of power and ITPC jointly demonstrate  
288 that the better one's brain oscillations entrain to the higher-order temporal structure of

289 the contextual rhythms, the larger attentional enhancement one may exhibit in the  
290 between-cycle condition over the within-cycle condition.

291 *T2-related alpha power reflects the attentional modulation*

292 Alpha oscillations have been considered to play a crucial and even causal role in temporal  
293 attention, particularly in the AB effect (Hanslmayr et al., 2011; Klimesch, 2012). As the AB  
294 phenomenon is characteristic of its stimulation frequency approximately at 10 Hz within  
295 the alpha band, the brain can be in a resonant state with the AB stream at the same  
296 frequency. It has been demonstrated that an increase in alpha power at the stimulus  
297 frequency indicated attentional orienting to the stimulus stream, providing an on-line  
298 measure of attentional allocation over the RSVP stream (Müller & Hübner, 2002). On the  
299 other hand, enhanced alpha power in the AB task has also been shown to be associated  
300 with correct T2 detection (Janson et al., 2014; Keil et al., 2006). Motivated by these  
301 findings, we investigated whether alpha activity related to T2 processing could reflect the  
302 attentional modulation in our study. We calculated alpha power around stimulation  
303 frequency (9.5–10.5 Hz) within the time window of 0–100 ms after T2 onset, and found  
304 two significant clusters for the context session—one in the left parieto-occipital region  
305 (Fig. 5A; T7, C5, C3, TP7, CP5, CP3, P5, P3, PO5, PO3, O1) and the other in a right-lateralized  
306 region (AF4, F2, F4, FC4, FC6, FT8, C4, C6, T8, CP4, CP6, TP8, P8), both showing stronger  
307 alpha power in the between-cycle condition than in the within-cycle condition (for the left  
308 cluster,  $t(15) = 3.570$ ,  $p = .0014$ ; for the right cluster,  $t(15) = 3.631$ ,  $p = .0012$ , right-tailed,  
309 cluster-based permutation test). This increase in T2-related alpha power, which could be  
310 regarded as a sign of stimulus-driven neural activity, agrees well with the observations  
311 that more attentional resources are deployed to T2 and thus higher accuracy was achieved  
312 in the between-cycle condition than in the within-cycle condition.

313 *Cross-frequency coupling between delta phase and alpha power correlates with the*  
314 *attentional modulation effect*

315 Examinations on delta-band entrainment effect and T2-related alpha power both reveal  
316 behavioral relevance in our study. This leads to a natural question of whether the observed

317 attentional modulation effect is implemented through a coordinative process between  
318 neural oscillations at delta and alpha bands. To address this question, we analyzed cross-  
319 frequency coupling between delta phase and alpha power, which has been found to  
320 support the attentional selection between competing stimuli (Gomez-Ramirez et al., 2011;  
321 Wilson & Foxe, 2020; Wöstmann et al., 2016). We conducted the analysis in two clusters  
322 whose neural responses in both the delta band (the ITPC at 2.5 Hz) and the alpha band  
323 (T2-related alpha power) had an established link with the attentional modulation effect:  
324 one in the parieto-occipital region (P5, PO3, PO5, O1) and the other in the frontal region  
325 (AF4, F2, F4). We calculated the modulation index (MI) of phase-amplitude coupling (PAC)  
326 between delta (1.5–3.5 Hz) and alpha band (7–13 Hz) for each cluster. The MI was  
327 stronger in the between-cycle condition than in the within-cycle condition, while the  
328 effect reached significance only in the parieto-occipital region (Fig. 5B;  $t(15) = 2.432$ ,  $p$   
329  $= .028$ ) but not in the frontal region ( $t(15) = 1.459$ ,  $p = .165$ ). More importantly, this  
330 contrast effect of delta-alpha PAC showed a positive correlation with the attentional  
331 modulation effect on behavioral performance, which was also restricted to the parieto-  
332 occipital region (Fig. 5C;  $r = .660$ ,  $p = .005$ ) and not found in the frontal region ( $r = .154$ ,  $p$   
333  $= .569$ ). To further confirm the association between the delta-alpha PAC and the observed  
334 attentional modulation effect, we did a cluster-based permutation test, which again  
335 yielded a positively significant cluster in the parieto-occipital region (PO7, PO5, PO3, O1,  
336 OZ;  $r = .697$ ,  $p = .003$ ). These results, combined with the findings from single-band  
337 analyses, indicate that cortical tracking of hierarchical temporal structures of the auditory  
338 context, as well as the coordination of such cortical tracking effects in delta and alpha  
339 bands, may play a vital role in reconstructing the deployment of visual attentional in the  
340 AB task.

## 341 **Discussion**

### 342 **Temporal attention guided by time- and feature-based regularities**

343 Dynamic information flows, such as speech and music, are composed of rhythmic  
344 structures nested across multiple timescales (Ding et al., 2016; Gross et al., 2013; Koelsch  
345 et al., 2013; Peelle & Davis, 2012). These hierarchical structures are organized in time

346 based on regularities in stimulus timing, that is, when sensory signals are emitted (time-  
347 based), as well as regularities in information content, that is, how physical or semantic  
348 features of the sensory inputs change over time (feature-based). Accrued evidence  
349 suggests that temporal structures formed by time-based regularities are effective in  
350 directing attention and enhance information selection at the expected time points (Jones  
351 et al., 2002; Nobre et al., 2007; Nobre & van Ede, 2018). Yet the current study  
352 demonstrates the role of feature-based temporal structures in recomposing temporal  
353 attention deployment, which optimizes the distribution of attentional resources over two  
354 temporally proximate targets in the AB task.

355 We modified the standard AB paradigm by introducing a contextual stream whose  
356 physical property changed periodically to form perceivable, but unattended rhythmic  
357 cycles in the background. Although this feature-based temporal structure was task-  
358 irrelevant, it modulated the deployment of attentional resources along the AB stream, as  
359 indicated by higher T2 detection performance when the two targets were located in  
360 different cycles than in the same cycle. More intriguingly, this modulation effect was  
361 observed no matter whether the contextual stream was from the auditory (Experiment 1)  
362 or the visual (Experiment 2) modality. These findings provide clear evidence that  
363 temporal structures defined by periodic changes of physical features in a dynamic context  
364 can automatically reconstruct the temporal distribution of visual attention.

365 In the current study, the rhythmic cycles in the contextual stream consisted of a set of  
366 temporally grouped items, some with abrupt changes in physical features across the cycle  
367 boundaries. Could the attentional modulation effect be achieved purely on the basis of  
368 transient perceptual boundaries or temporal grouping? Findings from several control  
369 experiments do not agree with these assumptions. In Experiment 3, the rhythmic cycles  
370 of contextual rhythms were defined by cyclic motion without any abrupt changes at the  
371 boundaries. Even in this case, the cyclic motion yielded a significant attentional  
372 modulation effect, excluding the possibility that the observed effect was caused simply by  
373 perceptual changes of the background. In addition, results from Experiments 1d and 1e  
374 further confirm that temporal attention guided by temporal regularities rather than  
375 perceptual grouping is key to the reduced AB effect. On the one hand, simple grouping

376 without feature-based temporal regularities had little influence on T2 detection (as in  
377 Experiment 1d, the feature-based grouping was irregular). On the other hand, when we  
378 disrupted time-based regularities by using stochastic stimulus timing, the attentional  
379 modulation effect also vanished, even though the rule of feature-based grouping remained  
380 in force (as in Experiment 1e, every four identical tones constituted one group). Jointly,  
381 these findings point to a mechanism of temporal attentional guidance independent of  
382 transient perceptual cues and simple perceptual grouping.

383 It is worth noting that the attentional modulation effect did not occur in the absence  
384 of regular stimulus timing. In other words, the feature-based regularities should work in  
385 tandem with the time-based regularities to reconstruct the dynamics of visual temporal  
386 attention, at least under the current experimental settings. This finding is consistent with  
387 the emerging view concerning the role of a diversity of temporal structures in guiding  
388 adaptive behavior (Nobre & van Ede, 2018). It has been suggested by studies using  
389 auditory materials, mostly in speech and music perception, that temporal regularities  
390 embedded in information content can act along with the time-based anticipation in  
391 attentional guidance (Doelling & Poeppel, 2015; Morillon et al., 2016; Peelle & Davis, 2012;  
392 Zion Golumbic et al., 2012). Our findings extend these studies by establishing a  
393 mechanism in visual temporal attention that is guided by regularities in feature-defined  
394 structures on top of the anticipation based on stimulation timing.

### 395 **The roles of dynamic attentional deployment in reducing attentional blink and** 396 **boosting awareness**

397 The AB phenomenon represents a bottleneck of conscious awareness pertaining to the  
398 temporal resolution of visual attention. It is well known for its robustness that even long  
399 repetitive training cannot eliminate the AB effect (Braun, 1998). Some studies have  
400 demonstrated attenuated AB magnitude, as manifested in increased T2 detectability, by  
401 enhancing T2 salience with color-salience training (Choi et al., 2012), emotional arousal  
402 (Keil & Ihssen, 2004), or concurrent sounds (Olivers & Van der Burg, 2008). Another line  
403 of research has also reported improved T2 performance when explicitly cueing the target-  
404 onset-asynchrony (TOA) on a trial-by-trial basis (Martens & Johnson, 2005) or

405 manipulating the predictability of target onset (Tang et al., 2014; Visser et al., 2015).  
406 Despite implementing different approaches, all these studies tried to manipulate certain  
407 aspects of T2, regarding either its salience or predictability in time. By contrast, in our  
408 study, the salience of targets and temporal expectations about T2 onset were comparable  
409 across all experimental conditions. The only difference between the within- and between-  
410 cycle conditions was the positions of the two targets relative to the feature-defined  
411 temporal structure. Under this situation, items in the RSVP stream were no longer  
412 encoded in isolation, but treated as a part of a structured information flow that could be  
413 organized by periodic changes in the context. In particular, when T1 and T2 were  
414 separated in different cycles, the temporal relations between them were reframed, which  
415 might at least partially reduce the competition between the targets, thus improving the  
416 resolution of visual temporal attentional and boosting the conscious access to T2. Instead  
417 of emphasizing the role of a given target or a certain time point, our findings highlight the  
418 significance of attentional deployment as a dynamic process in regulating visual  
419 awareness and the AB effect, which is modulated by temporal structures of the entire  
420 information flow.

## 421 **Neural entrainment to hierarchical contextual rhythms modulates dynamic** 422 **attending in visual perception**

423 Neural oscillations can be entrained to external rhythms across different frequencies  
424 (Calderone et al., 2014; Escoffier et al., 2015; Henry et al., 2014; Mathewson et al., 2012;  
425 Schroeder et al., 2010; Schroeder & Lakatos, 2009; Thut & Gross, 2011), allowing the brain  
426 to encode dynamic information with multiplexed rhythmic structures across different  
427 timescales (Fontolan et al., 2014; Lakatos et al., 2005; O'Connell et al., 2015). A common  
428 example of this comes from studies of speech processing. The linguistic structure  
429 possesses a temporal hierarchy—from smaller phonetic elements to larger syllabic and  
430 phrasal units, which accordingly elicit neural entrainment at multiple frequency bands  
431 (Arnal & Giraud, 2012; Zion Golumbic et al., 2012). There is growing evidence that cortical  
432 tracking of the higher-order structures plays a vital role in speech and music  
433 comprehension (Ding et al., 2016; Doelling & Poeppel, 2015; Gross et al., 2013; Koelsch et



434 al., 2013; Peelle & Davis, 2012). In our EEG study, we demonstrate an analogous  
435 entrainment effect that not only keeps track of the original AB stream at 10 Hz but also  
436 represents the higher-order feature-based structure of contextual rhythms at 2.5 Hz. More  
437 importantly, the magnitude of the 2.5-Hz entrainment effect is significantly correlated  
438 with the strength of the attentional modulation effect. The scalp topographic map of  
439 correlation is lateralized and restricted to the left parietal region, which was found to be  
440 associated with temporal attention (Bolger et al., 2014; Coull & Nobre, 1998). These  
441 findings are in good accordance with the assumption that the cortical tracking of feature-  
442 based contextual structure is critical to the redeployment of attentional resources over  
443 the AB stream and may lead to the behavioral modulation effect.

444 The AB paradigm is characterized by its stimulation frequency approximately at 10  
445 Hz within the alpha band. In our experiment, the 10-Hz power after T2 is stronger in the  
446 between-cycle condition than in the within-cycle condition, which probably because the  
447 increased attentional resources delivered to T2 enhance the stimulus-evoked neural  
448 responses in the between-cycle condition (Janson et al., 2014; Keil et al., 2006). Further  
449 analysis reveals that, in the left parieto-occipital cluster that exhibits phase-locked neural  
450 responses to feature-based structures of the contextual rhythms and a T2-related  
451 increment in alpha power, there is a phase-amplitude coupling between the delta and  
452 alpha oscillations. Moreover, the strength of this delta-alpha coupling effect predicts the  
453 effect of higher-order temporal structures on dynamic attentional allocation at the  
454 individual level. These findings corroborate the idea that neural entrainment to a slower  
455 external rhythm may serve as a mechanism of attentional selection, with the phase of delta  
456 oscillation regulating the excitability of neural activity in the alpha band (Gomez-Ramirez  
457 et al., 2011; Wilson & Foxe, 2020; Wöstmann et al., 2016).

458 Taken together, findings from the current study have cast new light on the classic  
459 theory of DAT and its neural implementation. The DAT assumes attention to be inherently  
460 oscillatory and can be driven by the timing pattern of external events (Jones, 1976; Jones  
461 et al., 1982; Jones & Boltz, 1989; Large & Jones, 1999). By taking advantage of temporal  
462 regularities of isochronous or rhythmic events, attentional synchrony can be established  
463 and thus improve perceptual accuracy and elevate response speed. Our study extends the

464 DAT to more general cases of dynamic information processing at both the behavioral and  
465 the neural levels. Primarily, our behavioral observations suggest that to utilize regularities  
466 in a hierarchical temporal structure, the internal attentional oscillation may not only align  
467 with first-order rhythmic structures based on stimulus timing, but also with higher-order  
468 rhythmic structures defined by content-based changes of the information flow. Such a  
469 dynamic attending process necessitates the synergy between time- and content-based  
470 regularities, which could be implemented by neural entrainment to the higher-order  
471 temporal structure and its coordination with the cortical tracking of the stimulus rhythm  
472 through cross-frequency coupling.

### 473 **Conclusion**

474 In summary, the current study emphasizes the role of feature-defined contextual rhythms  
475 in reconstructing the deployment of visual attention along dynamic information streams.  
476 This work enriches our knowledge, as raised at the beginning of this article, about how  
477 we optimize the limited mental capacity to process successive inputs from this ever-  
478 changing world. Taking the AB phenomenon as an example, we provide a new perspective  
479 on visual temporal attention research—when examining the perception of complex  
480 dynamic information, temporal context on multiple timescales should be taken into  
481 consideration because it provides a meaningful hierarchical temporal frame for  
482 attentional deployment. This temporal frame, implemented by neural entrainment, may  
483 serve to organize attentional resources in a prospective manner and help construct our  
484 conscious experience of the world in the dimension of time.

## 485 **Materials and Methods**

### 486 **Participants**

487 A total of one hundred and forty-four volunteers (aged from 18 to 30 years, 69 females)  
488 were recruited and paid for their participation in the current study. One hundred and  
489 twenty-eight participated in the behavioral Experiments 1a-1e, 2a-2b, and 3 (16 for each  
490 experiment, with participants' gender balanced), and 16 (5 females) in the EEG  
491 experiment. All participants had normal or corrected-to-normal vision and normal  
492 hearing and were naïve to the purpose of the experiment. Considering the individual  
493 differences in the AB effect, only participants who exhibited a typical AB effect (i.e., an  
494 impairment of T2 accuracy at short lags compared with that at long lags) during a pre-  
495 screening session were asked to take part in the formal experiments. All participants  
496 provided written informed consent in accordance with experimental procedures and  
497 protocols approved by the Institutional Review Board of the Institute of Psychology,  
498 Chinese Academy of Sciences.

### 499 **Stimuli**

500 The rapid visual serial presentation (RSVP) stream used in the AB task consisted of 16  
501 items (except in Experiments 1c and 1d). Among these items, one or two were the targets  
502 (capital letters selected from the alphabet, excluding B, D, O, I, M, Q, S, W, and Z), and the  
503 remaining were distractors (one-digit numbers, 1 and 0 excluded, without repetitions  
504 between any two of four successive digits). The items were displayed for 83 ms each and  
505 were separated by 17 ms blank intervals (except Experiment 1e), generating a 10 Hz  
506 rhythm based on stimulus presentation (see Fig. 1A, top). Each item subtended  $0.47^\circ \times 0.57^\circ$   
507 of visual angle and was displayed in white within a gray square ( $3^\circ \times 3^\circ$ ) located at the  
508 center of a black screen. In each experiment, a contextual stream, which contained the  
509 same number of items as the AB stream but was organized by a feature-defined structure,  
510 was presented in synchronization with the AB stream. Stimuli were generated and  
511 displayed using MATLAB (The MathWorks Inc., Natick, MA) with the Psychophysics  
512 toolbox extension (Brainard, 1997). Visual stimuli were presented on a 21-inch CRT  
513 monitor with a viewing distance of 55 cm in a dim room. Auditory stimuli were delivered

514 binaurally over Bose QC3 headphones with the volume set to a comfortable listening level.

## 515 **Procedures**

### 516 **Behavioral Experiments**

517 In all experiments, participants were explicitly instructed to ignore the contextual events  
518 and focused attention on the AB task. Participants initiated each trial by pressing the enter  
519 key. A white fixation cross appeared for 600 ms at the center of the screen, followed by the  
520 presentation of an AB stream (along with an auditory/visual stream in the context  
521 session). After the last item disappeared, the central fixation turned blue to remind the  
522 participant to report the identities of the target(s) in the order they detected them by  
523 typing on the keyboard.

524 Experiment 1a had a baseline session followed by a context session. In the baseline  
525 session, participants viewed only the AB stream and performed the typical AB task. To  
526 induce the AB effect, the second target (T2) in the AB stream was located at the second  
527 lag of the first target (T1) with a short stimulus onset asynchrony (SOA) of 200 ms, as the  
528 magnitude of AB effect is most robust around the second and the third lags. In contrast  
529 with the short-SOA condition, we introduced a long-SOA condition where T2 always  
530 appeared at the 8th Lag of T1 and could rarely be missed. To measure the false alarm rate,  
531 we also included catch trials in which only one target was displayed. The context session  
532 had the same settings and task as the baseline session, except that a task-irrelevant  
533 auditory stream was presented in synchronization with the original RSVP stream.  
534 Specifically, the auditory stream was composed of 16 tones, each aligned with the onset of  
535 a visual item and displayed for 30 ms. The tone sequence changed its pitch from high  
536 (2000 Hz) to low (1200 Hz) or vice versa every four items (corresponding to 400 ms),  
537 generating 4 auditory cycles (i.e., 4-4-4-4) at a rate of 2.5 Hz (Fig. 1A, middle). To examine  
538 the regulation effect of such pitch-defined rhythmic structures, we created two  
539 experimental conditions specifically for the short-SOA trials, by varying the positions of  
540 T1 and T2 relative to the contextual cycles. In the “between-cycle condition”, T1 and T2  
541 were located in two adjacent cycles; and in the “within-cycle condition”, the two targets  
542 were located in the same cycle. To reduce observers’ anticipation about the timing of T1

543 onset across trials, we introduced various T1 positions while keeping T2 located within  
544 the middle two cycles. Each session had 120 experimental trials (40 trials for the between-  
545 cycle, within-cycle, and long SOA condition each) and 20 catch trials. These trials were  
546 divided into four equal blocks, with randomized trial order within each block.

547 Experiment 1b-1e adopted the same procedure as Experiment 1a but with the  
548 following exceptions. In Experiment 1b, as shown in Fig. 1A (bottom), we abolished the  
549 feature-based structure of the contextual streams by pseudo-randomizing the auditory  
550 tone sequences while keeping the pitch of tones at target locations the same as that in  
551 Experiment 1a. In Experiment 1c, we changed the temporal structure of the contextual  
552 streams by altering their pitch change rate, generating two types of auditory sequences:  
553 one with 4 five-tone cycles displayed at 2Hz (i.e., 5-5-5-5, see Fig. 2A, upper), and the other  
554 with 5 three-tone cycles at 3.3 Hz (i.e., 3-3-3-3-3, see Fig. 2A, lower). For both frequency  
555 conditions, T2 was located in the next to last or third from last cycles. In Experiment 1d,  
556 we varied the length of chunks in the contextual streams, generating auditory sequences  
557 with four cycles of different lengths (e.g., 5-2-4-3) but always having 4 tones in the third  
558 cycle where the second target appeared (see Fig. 2C, upper). In Experiment 1e, the feature-  
559 based structure remained while the rhythm from stimulus timing was removed (see Fig.  
560 2C, lower). Specifically, the tone pitch changed every four items just as in Experiment 1a,  
561 whereas the stimulus onset asynchrony (SOA) of each visual item was selected randomly  
562 from a predetermined uniform distribution (50, 67, 83, 100, 100, 117, 133, 150 ms) to  
563 keep the total presentation time identical to that in Experiment 1a. In both Experiment 1d  
564 and 1e, T2 was always the second item in the 3rd cycle for the between-cycle condition  
565 and the last item in the 3rd cycle for the within-cycle condition.

566 Experiments 2a and 2b had a design similar to that of Experiments 1a and 1b, except  
567 that we replaced the auditory context with a visually presented contextual stream that  
568 possessed color-defined temporal structure. Specifically, in the context session of  
569 Experiment 2a, the color of the background square changed from green to red or vice  
570 versa at the same tempo as that for contextual tones in Experiment 1a (Fig. 3A, upper).  
571 And in Experiment 2b, the background color changed in arrhythmic patterns (Fig. 3C,  
572 upper). Luminance of the two colors was matched for each observer with a chromatic

573 flicker fusion procedure before the experiments.

574 Experiment 3 consisted of an experimental session with a structured context as that  
575 in Experiment 2a and a control session with a random context as that in Experiment 2b.  
576 In the experimental session, the contextual rhythm was created by cyclic motion patterns  
577 in the background (Fig. 3E, upper). Specifically, a blue right-angle (width =  $0.38^\circ$ , side  
578 length =  $1.5^\circ$ ), initiating from one corner (the upper-left or the upper-right, balanced  
579 between blocks) of the background square, rotated clockwise at the same pace as the AB  
580 stream. In this way, one cycle of rotation corresponded to the appearance of four items  
581 (i.e., 400 ms), forming a 2.5 Hz structure based on the motion cycles. In the control session,  
582 no cyclic motion pattern remained but the right-angle shifted to a random quadrant under  
583 the constraint of identical initial quadrant in each 'cycle' (Fig. 3E, lower).

584 Note that in all these experiments, we also labelled the conditions in baseline and  
585 control sessions as "within-cycle" or "between-cycle", just to indicate that these conditions  
586 shared the same absolute target positions with the corresponding conditions in the  
587 context session. This design was adopted to control for any potential influence of the  
588 absolute position of a target within the AB stream. Specifically, for each experimental  
589 condition (within- or between-cycle), we matched the absolute positions of T1 and T2  
590 between the context session and the baseline session without a context (Experiments 1–  
591 2), or between the experimental session and the control session with a random context  
592 (Experiments 1 & 3).

### 593 **EEG Experiment**

594 The procedure of the EEG experiment was mostly identical to that of Experiment 1a except  
595 for the following modifications. Black items were presented on a gray background and the  
596 item size was  $0.59^\circ \times 0.78^\circ$ . In each trial, the fixation duration was 1000 ms and each item  
597 was displayed for 100 ms with no blank interval. After response, there was a 1.2–1.5 s  
598 blank interval. Each subject completed 3 baseline blocks followed by 6 experimental  
599 blocks with the auditory context. Each block consisted of 40 trials, with 17 short-SOA trials  
600 in each of the between- and within-cycle condition, and the remaining 6 as the catch trials,  
601 run in a random order.

## 602 **EEG recording**

603 A SynAmps<sup>2</sup> Neuroscan amplifier system (Compumedics Ltd, Abbotsford, Australia) was  
604 used for data acquisition. EEG signals were recorded continuously from 64 Ag/AgCl  
605 electrodes mounted on an elastic cap according to the extended 10–20 system, with a  
606 reference electrode placed between Cz and CPz. Vertical and horizontal eye movements  
607 were monitored with two bipolar EOG electrode pairs positioned above and below the left  
608 eye and on the outer canthus of each eye. Data were acquired at a sampling rate of 1000  
609 Hz with an online 0.05-100 Hz band-pass filter (notched at 50 Hz). Electrode impedances  
610 were kept below 8 k $\Omega$  for all electrodes.

## 611 **EEG data analysis**

### 612 *Preprocessing*

613 Data preprocessing and analysis was performed using EEGLAB toolbox (Delorme &  
614 Makeig, 2004) and FieldTrip (Oostenveld et al., 2011) in combination with custom  
615 MATLAB scripts. EEG recordings were down-sampled offline to 500 Hz, high-pass filtered  
616 at 0.3 Hz, and then segmented into 2200 ms trials from -600 to 1600 ms relative to the  
617 onset of the AB stream. Ocular artifacts were then identified and removed using the  
618 ADJUST algorithm (Mognon et al., 2011) based on independent component analysis (ICA).  
619 Segments with voltage deflections greater than 75  $\mu$ V were rejected. Residual artifacts  
620 were checked by visual inspection. On average, 90 trials remained for each condition and  
621 each individual. The segmented data were re-referenced to the average potential of all  
622 electrodes excluding the mastoid and EOG electrodes.

### 623 *Power analysis*

624 The preprocessed EEG signals were first corrected by subtracting the average activity of  
625 the entire stream for each epoch, and then averaged across trials for each condition, each  
626 participant, and each electrode. Then signals from stream onset were zero-padded and  
627 fast Fourier transformed, yielding amplitude and phase estimation at a frequency  
628 resolution of 0.5 Hz. Power spectra was calculated as the squared amplitude and then  
629 converted to decibel scale (i.e.,  $10 \cdot \log_{10}$ ). To remove unrelated background noises from

630 the frequency response of stimulus rhythms, for each frequency, the mean power at two  
631 nearest neighboring frequencies was subtracted from the power at that center frequency.  
632 The subtracted power at each frequency was then averaged across all channels (excluding  
633 M1, M2, VEO, HEO, CB1 and CB2) and compared with zero using one-sample *t* test to  
634 determine whether neural oscillations were entrained to temporal structures of the  
635 stimulus rhythms. Multiple comparisons across frequencies were controlled by the false  
636 discovery rate (FDR,  $p < .05$ ) procedure.

### 637 *Phase locking analysis*

638 Inter-trial phase coherence (ITPC) serves to indicate the consistency with which intrinsic  
639 neural oscillations were phase-locked to the external rhythms over trials. We first  
640 obtained phase estimation from spectral decomposition for each single trial based on fast  
641 Fourier transform, and then calculated ITPC as follows:

$$642 \text{ITPC}(f) = \left| \frac{1}{n} \sum_{k=1}^n \left( \frac{F_k(f)}{|F_k(f)|} \right) \right| \quad (1)$$

643 where, for  $n$  trials,  $F_k(f)$  is the spectral estimate of trial  $k$  at frequency  $f$ , and  $||$  represents  
644 the complex norm.

### 645 *T2-related alpha power*

646 In order to measure the neural activity time-locked to T2 at alpha band, time-frequency  
647 analysis was performed by convolving single-trial data with a complex Morlet tapered  
648 wavelet using the *newtimef* function of EEGLAB. To optimize the trade-off between  
649 temporal and frequency resolution, the length of wavelets increased linearly from 1 cycle  
650 at the lowest frequency (2 Hz) to 7.5 cycles at the highest frequency (30 Hz, in increments  
651 of 0.5 Hz), resulting in power estimates from -321 to 1321 ms around stream onset. For  
652 each frequency, power at each time point was first averaged across trials and then divided  
653 by the average activity in baseline period from -300 to -200 ms and log-transformed to  
654 decibels.

655



656 *Delta-alpha phase-amplitude coupling analysis*

657 The modulation index (MI) of phase-amplitude coupling (PAC) was used to measure the  
658 coordinative modulation between the phase of ongoing oscillations in delta band (1.5–3.5  
659 Hz) and the power in alpha bands (7–13 Hz) at each electrode. First, the low-frequency  
660 phase at delta band ( $f_p$ ) and high-frequency amplitude at alpha band ( $f_a$ ) were estimated  
661 by filtering each epoch with a Butterworth bandpass filter and then applying the Hilbert  
662 transform. The broad bandwidth of alpha band (7–13 Hz) was determined to be wide  
663 enough to contain the side-bands of the modulating frequency at  $f_p$  (2.5 Hz) (Dvorak &  
664 Fenton, 2014; Seymour et al., 2017). Next, the modulation index of PAC was quantified  
665 using the mean-vector length method first introduced by Canolty et al. (Canolty et al.,  
666 2006). As shown in formula (2), for each epoch, the MI values were calculated by  
667 combining low-frequency phase and high-frequency amplitude into complex time series  
668 and then taking the length of the average vector within the selected time window (500–  
669 1300 ms relative to stream onset), which corresponded to the middle two cycles of the  
670 contextual stream. The first and last 400 ms of the stream was discarded to avoid the edge  
671 artifacts after bandpass filtering. The resulting MI values were then averaged across trials  
672 for each condition.

673 
$$MI = \left| \frac{1}{N} \sum_{n=1}^N A_H(n) e^{i(\phi_L(n))} \right| \quad (2)$$

674 where MI is estimated for a single trial with length of N samples or time points,  $A_H(n)$  is  
675 the amplitude of higher-frequency at time point  $n$ ,  $\phi_L(n)$  is the phase of lower-frequency  
676 at time point  $n$ , and  $||$  represents the complex norm.

677 *Correlation analysis*

678 To examine whether the above EEG indices were associated with the observed attentional  
679 modulation effect, we correlated these EEG indices with individual's behavioral  
680 modulation index (BMI), which was determined by the following formula:

681 
$$BMI = \frac{P_{BET} - P_{WIT}}{P_{BET} + P_{WIT}} \quad (3)$$

682 where  $P_{BET}$  and  $P_{WIT}$  were the accuracy rate of T2 identification in the between-cycle  
683 and the within-cycle conditions in the context session, respectively.

684 *Cluster-based permutation test*

685 To identify clusters of channels that are significant in each statistical test, we used the  
686 cluster-based permutation test, which was first stated by Maris and Oostenveld (Maris &  
687 Oostenveld, 2007) and used in a number of previous studies (Doelling & Poeppel, 2015;  
688 Spaak et al., 2014). Firstly, cluster-level statistics are calculated as the sum of channel-  
689 specific test statistics within every cluster. Then, the maximum of the cluster-level  
690 statistics is taken as the actual test statistic. Finally, the significance probability of the  
691 maximum cluster-level statistic is evaluated under the permutation distribution obtained  
692 with the Monte Carlo method in which the permutation cluster-level statistic is calculated  
693 by randomly swapping the conditions in participants 1000 times.

694 **Acknowledgements**

695 This research was supported by grants from the National Natural Science Foundation of  
696 China (31830037 and 31771211), the Strategic Priority Research Program  
697 (XDB32010300) and the Youth Innovation Promotion Association (2018116) of the  
698 Chinese Academy of Sciences, the National Key Research and Development Project  
699 (2020AAA0105600), and the Fundamental Research Funds for the Central Universities.

700 **Competing interests**

701 The authors declare that no competing interests exist.

## 702 **References**

- 703 Arnal, L. H., & Giraud, A.-L. (2012). Cortical oscillations and sensory predictions. *Trends*  
704 *in Cognitive Sciences*, *16*(7), 390–398. <https://doi.org/10.1016/j.tics.2012.05.003>
- 705 Bolger, D., Coull, J. T., & Schön, D. (2014). Metrical Rhythm Implicitly Orients Attention in  
706 Time as Indexed by Improved Target Detection and Left Inferior Parietal Activation.  
707 *Journal of Cognitive Neuroscience*, *26*(3), 593–605.  
708 [https://doi.org/10.1162/jocn\\_a\\_00511](https://doi.org/10.1162/jocn_a_00511)
- 709 Brainard, D. H. (1997). The Psychophysics Toolbox. *Spatial Vision*, *10*(4), 433–436.  
710 <https://doi.org/10.1163/156856897X00357>
- 711 Braun, J. (1998). Vision and attention: The role of training. *Nature*, *393*(6684), 424–425.  
712 <https://doi.org/10.1038/30875>
- 713 Bregman, A. S. (1994). *Auditory Scene Analysis: The Perceptual Organization of Sound*.  
714 MIT Press.
- 715 Broadbent, D. E., & Broadbent, M. H. P. (1987). From detection to identification:  
716 Response to multiple targets in rapid serial visual presentation. *Perception &*  
717 *Psychophysics*, *42*(2), 105–113. <https://doi.org/10.3758/BF03210498>
- 718 Brochard, R., Tassin, M., & Zagar, D. (2013). Got rhythm... for better and for worse. Cross-  
719 modal effects of auditory rhythm on visual word recognition. *Cognition*, *127*(2),  
720 214–219. <https://doi.org/10.1016/j.cognition.2013.01.007>
- 721 Calderone, D. J., Lakatos, P., Butler, P. D., & Castellanos, F. X. (2014). Entrainment of neural  
722 oscillations as a modifiable substrate of attention. *Trends in Cognitive Sciences*,  
723 *18*(6), 300–309. <https://doi.org/10.1016/j.tics.2014.02.005>
- 724 Canolty, R. T., Edwards, E., Dalal, S. S., Soltani, M., Nagarajan, S. S., Kirsch, H. E., Berger, M.  
725 S., Barbaro, N. M., & Knight, R. T. (2006). High Gamma Power Is Phase-Locked to  
726 Theta Oscillations in Human Neocortex. *Science*, *313*(5793), 1626–1628.  
727 <https://doi.org/10.1126/science.1128115>
- 728 Choi, H., Chang, L.-H., Shibata, K., Sasaki, Y., & Watanabe, T. (2012). Resetting capacity  
729 limitations revealed by long-lasting elimination of attentional blink through  
730 training. *Proceedings of the National Academy of Sciences*, *109*(30), 12242–12247.  
731 <https://doi.org/10.1073/pnas.1203972109>
- 732 Chun, M. M., & Potter, M. C. (1995). A two-stage model for multiple target detection in  
733 rapid serial visual presentation. *Journal of Experimental Psychology: Human*  
734 *Perception and Performance*, *21*(1), 109–127. [https://doi.org/10.1037/0096-](https://doi.org/10.1037/0096-1523.21.1.109)  
735 [1523.21.1.109](https://doi.org/10.1037/0096-1523.21.1.109)
- 736 Coull, J. T., & Nobre, A. C. (1998). Where and When to Pay Attention: The Neural Systems  
737 for Directing Attention to Spatial Locations and to Time Intervals as Revealed by  
738 Both PET and fMRI. *The Journal of Neuroscience*, *18*(18), 7426–7435.  
739 <https://doi.org/10.1523/JNEUROSCI.18-18-07426.1998>
- 740 Delorme, A., & Makeig, S. (2004). EEGLAB: An open source toolbox for analysis of single-  
741 trial EEG dynamics including independent component analysis. *Journal of*  
742 *Neuroscience Methods*, *134*(1), 9–21.  
743 <https://doi.org/10.1016/j.jneumeth.2003.10.009>
- 744 Ding, N., Melloni, L., Zhang, H., Tian, X., & Poeppel, D. (2016). Cortical tracking of

- 745 hierarchical linguistic structures in connected speech. *Nature Neuroscience*, 19(1),  
746 158–164. <https://doi.org/10.1038/nn.4186>
- 747 Doelling, K. B., & Poeppel, D. (2015). Cortical entrainment to music and its modulation by  
748 expertise. *Proceedings of the National Academy of Sciences*, 201508431.  
749 <https://doi.org/10.1073/pnas.1508431112>
- 750 Dux, P. E., & Marois, R. (2009). The attentional blink: A review of data and theory.  
751 *Attention, Perception, & Psychophysics*, 71(8), 1683–1700.  
752 <https://doi.org/10.3758/APP.71.8.1683>
- 753 Dvorak, D., & Fenton, A. A. (2014). Toward a proper estimation of phase–amplitude  
754 coupling in neural oscillations. *Journal of Neuroscience Methods*, 225, 42–56.  
755 <https://doi.org/10.1016/j.jneumeth.2014.01.002>
- 756 Escoffier, N., Herrmann, C. S., & Schirmer, A. (2015). Auditory rhythms entrain visual  
757 processes in the human brain: Evidence from evoked oscillations and event-related  
758 potentials. *NeuroImage*, 111, 267–276.  
759 <https://doi.org/10.1016/j.neuroimage.2015.02.024>
- 760 Fontolan, L., Morillon, B., Liegeois-Chauvel, C., & Giraud, A.-L. (2014). The contribution of  
761 frequency-specific activity to hierarchical information processing in the human  
762 auditory cortex. *Nature Communications*, 5, 4694.  
763 <https://doi.org/10.1038/ncomms5694>
- 764 Gomez-Ramirez, M., Kelly, S. P., Molholm, S., Sehatpour, P., Schwartz, T. H., & Foxe, J. J.  
765 (2011). Oscillatory Sensory Selection Mechanisms during Intersensory Attention to  
766 Rhythmic Auditory and Visual Inputs: A Human Electroencephalographic Investigation.  
767 *The Journal of Neuroscience*, 31(50), 18556–18567.  
768 <https://doi.org/10.1523/JNEUROSCI.2164-11.2011>
- 769 Grahn, J. A., & McAuley, J. D. (2009). Neural bases of individual differences in beat  
770 perception. *NeuroImage*, 47(4), 1894–1903.  
771 <https://doi.org/10.1016/j.neuroimage.2009.04.039>
- 772 Gross, J., Hoogenboom, N., Thut, G., Schyns, P., Panzeri, S., Belin, P., & Garrod, S. (2013).  
773 Speech Rhythms and Multiplexed Oscillatory Sensory Coding in the Human Brain.  
774 *PLoS Biol*, 11(12). <https://doi.org/10.1371/journal.pbio.1001752>
- 775 Haegens, S., & Zion Golumbic, E. (2018). Rhythmic facilitation of sensory processing: A  
776 critical review. *Neuroscience & Biobehavioral Reviews*, 86, 150–165.  
777 <https://doi.org/10.1016/j.neubiorev.2017.12.002>
- 778 Hanslmayr, S., Gross, J., Klimesch, W., & Shapiro, K. L. (2011). The role of alpha  
779 oscillations in temporal attention. *Brain Research Reviews*, 67(1–2), 331–343.  
780 <https://doi.org/10.1016/j.brainresrev.2011.04.002>
- 781 Henry, M. J., & Herrmann, B. (2014). Low-frequency neural oscillations support dynamic  
782 attending in temporal context. *Timing & Time Perception*, 2, 62–86.  
783 <https://doi.org/10.1163/22134468-00002011>
- 784 Henry, M. J., Herrmann, B., & Obleser, J. (2014). Entrained neural oscillations in multiple  
785 frequency bands comodulate behavior. *Proceedings of the National Academy of*  
786 *Sciences*, 111(41), 14935–14940. <https://doi.org/10.1073/pnas.1408741111>
- 787 Janson, J., De Vos, M., Thorne, J. D., & Kranczioch, C. (2014). Endogenous and Rapid Serial  
788 Visual Presentation-induced Alpha Band Oscillations in the Attentional Blink.

- 789 *Journal of Cognitive Neuroscience*, 26(7), 1454–1468.  
790 [https://doi.org/10.1162/jocn\\_a\\_00551](https://doi.org/10.1162/jocn_a_00551)
- 791 Jones, M. R. (1976). Time, our lost dimension: Toward a new theory of perception,  
792 attention, and memory. *Psychological Review*, 83(5), 323–355.  
793 <https://doi.org/10.1037/0033-295X.83.5.323>
- 794 Jones, M. R., & Boltz, M. (1989). Dynamic attending and responses to time. *Psychological*  
795 *Review*, 96(3), 459–491. <https://doi.org/10.1037/0033-295X.96.3.459>
- 796 Jones, M. R., Boltz, M., & Kidd, G. (1982). Controlled attending as a function of melodic  
797 and temporal context. *Perception & Psychophysics*, 32(3), 211–218.  
798 <https://doi.org/10.3758/BF03206225>
- 799 Jones, M. R., Kidd, G., & Wetzell, R. (1981). Evidence for rhythmic attention. *Journal of*  
800 *Experimental Psychology: Human Perception and Performance*, 7(5), 1059–1073.  
801 <https://doi.org/10.1037/0096-1523.7.5.1059>
- 802 Jones, M. R., Moynihan, H., MacKenzie, N., & Puente, J. (2002). Temporal Aspects of  
803 Stimulus-Driven Attending in Dynamic Arrays. *Psychological Science*, 13(4), 313–  
804 319. <https://doi.org/10.1111/1467-9280.00458>
- 805 Keil, A., & Ihssen, N. (2004). Identification Facilitation for Emotionally Arousing Verbs  
806 During the Attentional Blink. *Emotion*, 4(1), 23–35. [https://doi.org/10.1037/1528-](https://doi.org/10.1037/1528-3542.4.1.23)  
807 3542.4.1.23
- 808 Keil, A., Ihssen, N., & Heim, S. (2006). Early cortical facilitation for emotionally arousing  
809 targets during the attentional blink. *BMC Biology*, 4(1), 23.  
810 <https://doi.org/10.1186/1741-7007-4-23>
- 811 Klimesch, W. (2012). Alpha-band oscillations, attention, and controlled access to stored  
812 information. *Trends in Cognitive Sciences*, 16(12), 606–617.  
813 <https://doi.org/10.1016/j.tics.2012.10.007>
- 814 Koelsch, S., Rohrmeier, M., Torrecuso, R., & Jentschke, S. (2013). Processing of  
815 hierarchical syntactic structure in music. *Proceedings of the National Academy of*  
816 *Sciences*, 110(38), 15443–15448. <https://doi.org/10.1073/pnas.1300272110>
- 817 Kranczioch, C. (2017). Individual differences in dual-target RSVP task performance  
818 relate to entrainment but not to individual alpha frequency. *PLOS ONE*, 12(6),  
819 e0178934. <https://doi.org/10.1371/journal.pone.0178934>
- 820 Lakatos, P., Karmos, G., Mehta, A. D., Ulbert, I., & Schroeder, C. E. (2008). Entrainment of  
821 Neuronal Oscillations as a Mechanism of Attentional Selection. *Science*, 320(5872),  
822 110–113. <https://doi.org/10.1126/science.1154735>
- 823 Lakatos, P., Musacchia, G., O'Connell, M. N., Falchier, A. Y., Javitt, D. C., & Schroeder, C. E.  
824 (2013). The Spectrotemporal Filter Mechanism of Auditory Selective Attention.  
825 *Neuron*, 77(4), 750–761. <https://doi.org/10.1016/j.neuron.2012.11.034>
- 826 Lakatos, P., Shah, A. S., Knuth, K. H., Ulbert, I., Karmos, G., & Schroeder, C. E. (2005). An  
827 Oscillatory Hierarchy Controlling Neuronal Excitability and Stimulus Processing in  
828 the Auditory Cortex. *Journal of Neurophysiology*, 94(3), 1904–1911.  
829 <https://doi.org/10.1152/jn.00263.2005>
- 830 Large, E. W., & Jones, M. R. (1999). The dynamics of attending: How people track time-  
831 varying events. *Psychological Review*, 106(1), 119. [https://doi.org/10.1037/0033-](https://doi.org/10.1037/0033-295X.106.1.119)  
832 295X.106.1.119

- 833 Maris, E., & Oostenveld, R. (2007). Nonparametric statistical testing of EEG- and MEG-  
834 data. *Journal of Neuroscience Methods*, *164*(1), 177–190.  
835 <https://doi.org/10.1016/j.jneumeth.2007.03.024>
- 836 Martens, S., & Johnson, A. (2005). Timing attention: Cuing target onset interval  
837 attenuates the attentional blink. *Memory & Cognition*, *33*(2), 234–240.  
838 <https://doi.org/10.3758/BF03195312>
- 839 Martens, S., & Wyble, B. (2010). The attentional blink: Past, present, and future of a blind  
840 spot in perceptual awareness. *Neuroscience & Biobehavioral Reviews*, *34*(6), 947–  
841 957. <https://doi.org/10.1016/j.neubiorev.2009.12.005>
- 842 Mathewson, K. E., Fabiani, M., Gratton, G., Beck, D. M., & Lleras, A. (2010). Rescuing  
843 stimuli from invisibility: Inducing a momentary release from visual masking with  
844 pre-target entrainment. *Cognition*, *115*(1), 186–191.  
845 <https://doi.org/10.1016/j.cognition.2009.11.010>
- 846 Mathewson, K. E., Prudhomme, C., Fabiani, M., Beck, D. M., Lleras, A., & Gratton, G. (2012).  
847 Making Waves in the Stream of Consciousness: Entraining Oscillations in EEG Alpha  
848 and Fluctuations in Visual Awareness with Rhythmic Visual Stimulation. *Journal of*  
849 *Cognitive Neuroscience*, *24*(12), 2321–2333. [https://doi.org/10.1162/jocn\\_a\\_00288](https://doi.org/10.1162/jocn_a_00288)
- 850 Miller, J. E., Carlson, L. A., & McAuley, J. D. (2013). When What You Hear Influences When  
851 You See Listening to an Auditory Rhythm Influences the Temporal Allocation of  
852 Visual Attention. *Psychological Science*, *24*(1), 11–18.  
853 <https://doi.org/10.1177/09567976124446707>
- 854 Mognon, A., Jovicich, J., Bruzzone, L., & Buiatti, M. (2011). ADJUST: An automatic EEG  
855 artifact detector based on the joint use of spatial and temporal features.  
856 *Psychophysiology*, *48*(2), 229–240. [https://doi.org/10.1111/j.1469-](https://doi.org/10.1111/j.1469-8986.2010.01061.x)  
857 [8986.2010.01061.x](https://doi.org/10.1111/j.1469-8986.2010.01061.x)
- 858 Morillon, B., Schroeder, C. E., Wyart, V., & Arnal, L. H. (2016). Temporal Prediction in lieu  
859 of Periodic Stimulation. *Journal of Neuroscience*, *36*(8), 2342–2347.  
860 <https://doi.org/10.1523/JNEUROSCI.0836-15.2016>
- 861 Müller, M. M., & Hübner, R. (2002). Can the Spotlight of Attention Be Shaped Like a  
862 Doughnut? Evidence From Steady-State Visual Evoked Potentials. *Psychological*  
863 *Science*, *13*(2), 119–124. <https://doi.org/10.1111/1467-9280.00422>
- 864 Nobre, A. C., Correa, A., & Coull, J. (2007). The hazards of time. *Current Opinion in*  
865 *Neurobiology*, *17*(4), 465–470. <https://doi.org/10.1016/j.conb.2007.07.006>
- 866 Nobre, A. C., & van Ede, F. (2018). Anticipated moments: Temporal structure in attention.  
867 *Nature Reviews Neuroscience*, *19*(1), 34–48. <https://doi.org/10.1038/nrn.2017.141>
- 868 Nozaradan, S., Peretz, I., & Keller, P. E. (2016). Individual Differences in Rhythmic Cortical  
869 Entrainment Correlate with Predictive Behavior in Sensorimotor Synchronization.  
870 *Scientific Reports*, *6*, 20612. <https://doi.org/10.1038/srep20612>
- 871 Obleser, J., & Kayser, C. (2019). Neural Entrainment and Attentional Selection in the  
872 Listening Brain. *Trends in Cognitive Sciences*, *23*(11), 913–926.  
873 <https://doi.org/10.1016/j.tics.2019.08.004>
- 874 O’Connell, M. N., Barczak, A., Ross, D., McGinnis, T., Schroeder, C. E., & Lakatos, P. (2015).  
875 Multi-Scale Entrainment of Coupled Neuronal Oscillations in Primary Auditory  
876 Cortex. *Frontiers in Human Neuroscience*, 655.

- 877 <https://doi.org/10.3389/fnhum.2015.00655>
- 878 Olivers, C. N. L., & Van der Burg, E. (2008). Bleeping you out of the blink: Sound saves  
879 vision from oblivion. *Brain Research, 1242*, 191–199.
- 880 <https://doi.org/10.1016/j.brainres.2008.01.070>
- 881 Oostenveld, R., Fries, P., Maris, E., & Schoffelen, J.-M. (2011). FieldTrip: Open Source  
882 Software for Advanced Analysis of MEG, EEG, and Invasive Electrophysiological  
883 Data. *Computational Intelligence and Neuroscience, 2011*, e156869.
- 884 <https://doi.org/10.1155/2011/156869>
- 885 Peelle, J. E., & Davis, M. H. (2012). Neural oscillations carry speech rhythm through to  
886 comprehension. *Frontiers in Psychology, 3*, 320.
- 887 <https://doi.org/10.3389/fpsyg.2012.00320>
- 888 Posner, M. I. (1980). Orienting of attention. *Quarterly Journal of Experimental Psychology,*  
889 *32(1)*, 3–25. <https://doi.org/10.1080/00335558008248231>
- 890 Raymond, J. E., Shapiro, K. L., & Arnell, K. M. (1992). Temporary suppression of visual  
891 processing in an RSVP task: An attentional blink? *Journal of Experimental*  
892 *Psychology: Human Perception and Performance, 18(3)*, 849–860.
- 893 <https://doi.org/10.1037/0096-1523.18.3.849>
- 894 Schroeder, C. E., & Lakatos, P. (2009). Low-frequency neuronal oscillations as  
895 instruments of sensory selection. *Trends in Neurosciences, 32(1)*, 9–18.
- 896 <https://doi.org/10.1016/j.tins.2008.09.012>
- 897 Schroeder, C. E., Wilson, D. A., Radman, T., Scharfman, H., & Lakatos, P. (2010). Dynamics  
898 of Active Sensing and perceptual selection. *Current Opinion in Neurobiology, 20(2)*,  
899 172–176. <https://doi.org/10.1016/j.conb.2010.02.010>
- 900 Seymour, R. A., Rippon, G., & Kessler, K. (2017). The Detection of Phase Amplitude  
901 Coupling during Sensory Processing. *Frontiers in Neuroscience, 11*.
- 902 <https://doi.org/10.3389/fnins.2017.00487>
- 903 Shapiro, K. L., Raymond, J. E., & Arnell, K. M. (1997). The attentional blink. *Trends in*  
904 *Cognitive Sciences, 1(8)*, 291–296. [https://doi.org/10.1016/S1364-6613\(97\)01094-](https://doi.org/10.1016/S1364-6613(97)01094-2)  
905 [2](https://doi.org/10.1016/S1364-6613(97)01094-2)
- 906 Spaak, E., Lange, F. P. de, & Jensen, O. (2014). Local Entrainment of Alpha Oscillations by  
907 Visual Stimuli Causes Cyclic Modulation of Perception. *The Journal of Neuroscience,*  
908 *34(10)*, 3536–3544. <https://doi.org/10.1523/JNEUROSCI.4385-13.2014>
- 909 Tang, M. F., Badcock, D. R., & Visser, T. A. W. (2014). Training and the attentional blink:  
910 Limits overcome or expectations raised? *Psychonomic Bulletin & Review, 21(2)*, 406–  
911 411. <https://doi.org/10.3758/s13423-013-0491-3>
- 912 ten Oever, S., Schroeder, C. E., Poeppel, D., van Atteveldt, N., & Zion-Golumbic, E. (2014).  
913 Rhythmicity and cross-modal temporal cues facilitate detection. *Neuropsychologia,*  
914 *63*, 43–50. <https://doi.org/10.1016/j.neuropsychologia.2014.08.008>
- 915 Thut, G., & Gross, J. (2011). Entrainment of perceptually relevant brain oscillations by  
916 non-invasive rhythmic stimulation of the human brain. *Frontiers in Perception*  
917 *Science, 2*, 170. <https://doi.org/10.3389/fpsyg.2011.00170>
- 918 Visser, T. A. W., Ohan, J. L., & Enns, J. T. (2015). Temporal cues derived from statistical  
919 patterns can overcome resource limitations in the attentional blink. *Attention,*  
920 *Perception, & Psychophysics, 77(5)*, 1585–1595. <https://doi.org/10.3758/s13414->



921           015-0880-y  
922   Wilson, T. J., & Foxe, J. J. (2020). Cross-frequency coupling of alpha oscillatory power to  
923       the entrainment rhythm of a spatially attended input stream. *Cognitive*  
924       *Neuroscience*, 11(1–2), 71–91. <https://doi.org/10.1080/17588928.2019.1627303>  
925   Wöstmann, M., Herrmann, B., Maess, B., & Obleser, J. (2016). Spatiotemporal dynamics of  
926       auditory attention synchronize with speech. *Proceedings of the National Academy of*  
927       *Sciences*, 113(14), 3873–3878. <https://doi.org/10.1073/pnas.1523357113>  
928   Zion Golumbic, E. M., Poeppel, D., & Schroeder, C. E. (2012). Temporal context in speech  
929       processing and attentional stream selection: A behavioral and neural perspective.  
930       *Brain and Language*, 122(3), 151–161.  
931       <https://doi.org/10.1016/j.bandl.2011.12.010>  
932  
933

934 **Figures**

935 **Figure 1**

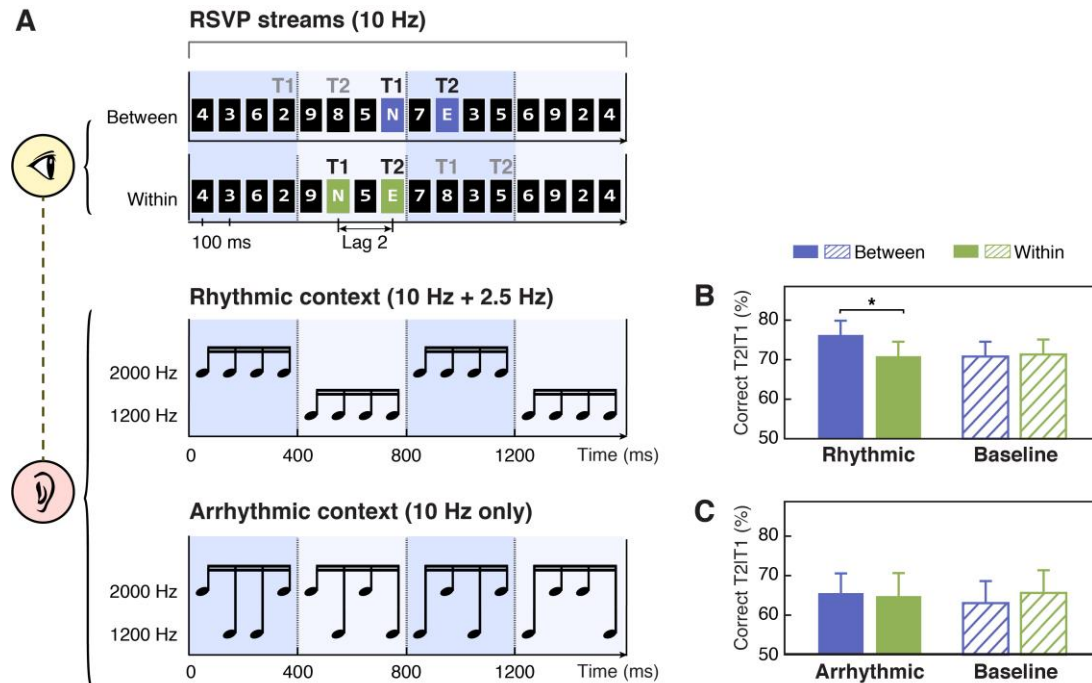

936 **Fig. 1.** Schematics of stimuli and results for Experiments 1a and 1b. (A) In the AB task,  
 937 participants were presented with rapid serial visual presentation (RSVP) streams at 10  
 938 Hz (top). Each stream contained two capital letter targets embedded in fourteen number  
 939 distractors. Black and gray “T1” and “T2” denote two alternative options for target  
 940 locations in the short-SOA conditions. These targets were located either in two adjacent  
 941 cycles (the between-cycle condition, displayed on violet background for illustration only)  
 942 or within the same rhythmic cycle (the within-cycle condition, displayed on green  
 943 background for illustration only) defined by a rhythmic auditory context in Experiment  
 944 1a (middle). Arrhythmic context was used as a control in Experiment 1b (bottom). (B & C)  
 945 T2 detection accuracy conditioned on correct T1 response for the experiments using  
 946 rhythmic and arrhythmic contexts. Note that in the baseline (visual-only) session, the  
 947 labels of “between” and “within” were used to refer to the conditions where the two  
 948 targets shared the same absolute positions with their corresponding conditions in the  
 949 context (audiovisual) session. Error bars represent 1 SEM; \*  $p < 0.05$ .

950 **Figure 2**

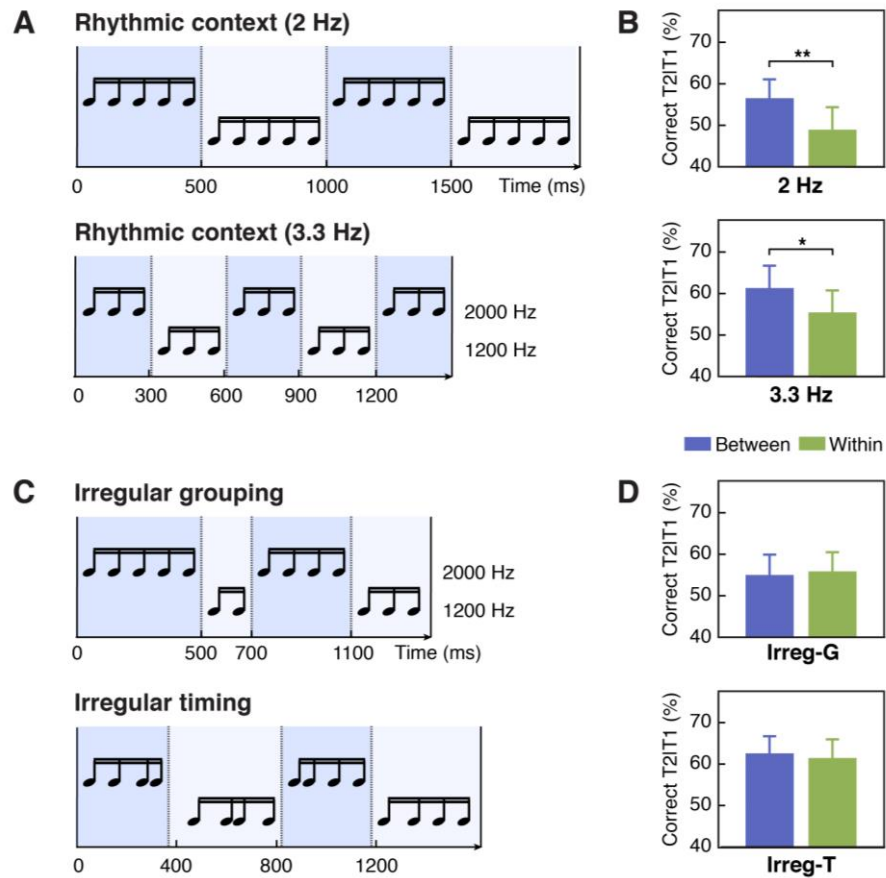

951 **Fig. 2.** Stimuli and results for Experiments 1c, 1d & 1e. (A) Contextual tone sequences with  
952 pitch changed every 5 tones (2 Hz, upper) and every 3 tones (3.3 Hz, lower) in Experiment  
953 1c. (B) T2 performance in short-SOA conditions for 2-Hz(upper) and 3.3-Hz (lower)  
954 sequence in Experiment 1c. (C) The auditory context was grouped irregularly into four  
955 chunks with different numbers of tones (G-irregular) in Experiment 1d (upper) and into  
956 four regular chunks (four tones in each) but with irregular onset timing (T-irregular) in  
957 Experiment 1e (lower). (D) T2 performance in Experiment 1d (upper) and 1e (lower).  
958 Error bars represent 1 SEM; \*  $p < 0.05$ , \*\*  $p < 0.01$ .

959 **Figure 3**

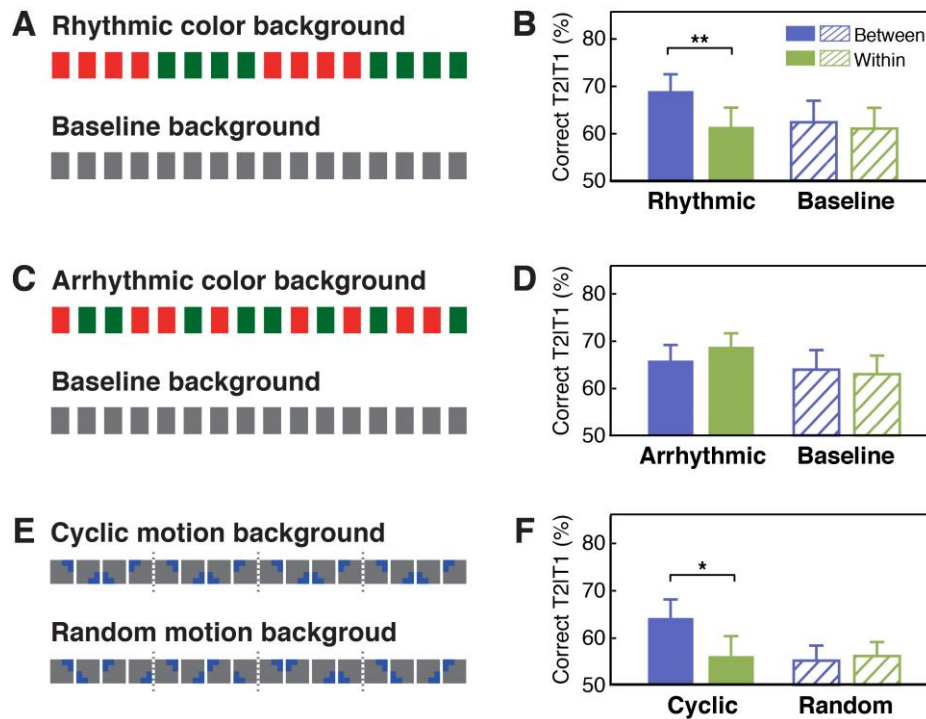

960 **Fig. 3.** Stimuli and results for Experiments 2 and 3 using the visual contexts. (A) The visual  
961 context with or without periodic changes in the background color and (B) the T2  
962 performance in Experiment 2a. (C) The visual context with or without the background  
963 color changed irregularly and (D) the T2 performance in Experiment 2b. (E) Contextual  
964 rhythms defined by cyclic/random motion at a constant speed and (F) the T2 performance  
965 in Experiment 3. Error bars represent 1 SEM; \*  $p < 0.05$ , \*\*  $p < 0.01$ .  
966

967 **Figure 4**

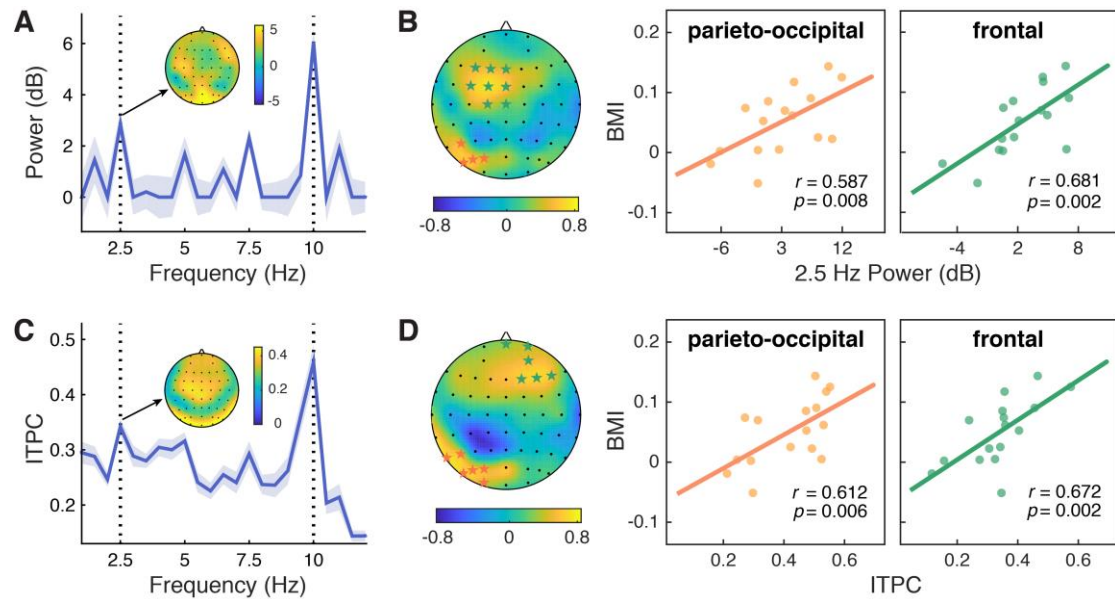

968 **Fig. 4.** Neural entrainment to contextual rhythms and its correlation with the attentional  
969 modulation effect. (A) The power spectrum of EEG signals averaged across all epochs and  
970 channels. For each frequency, power was normalized by subtracting the mean power of the  
971 two nearest neighboring frequencies from the power of the center frequency. Shaded  
972 areas indicate standard errors of the mean. (B) The 2.5-Hz power entrainment effect in  
973 the parieto-occipital cluster (middle, in orange) and the frontal cluster (right, in green),  
974 as indicated in the scalp topographic map (left), significantly correlated with the  
975 behavioral modulation index (BMI). (C & D) Analysis of inter-trial phase coherence (ITPC)  
976 results yielded similar patterns to that for power.  
977

978 **Figure 5**

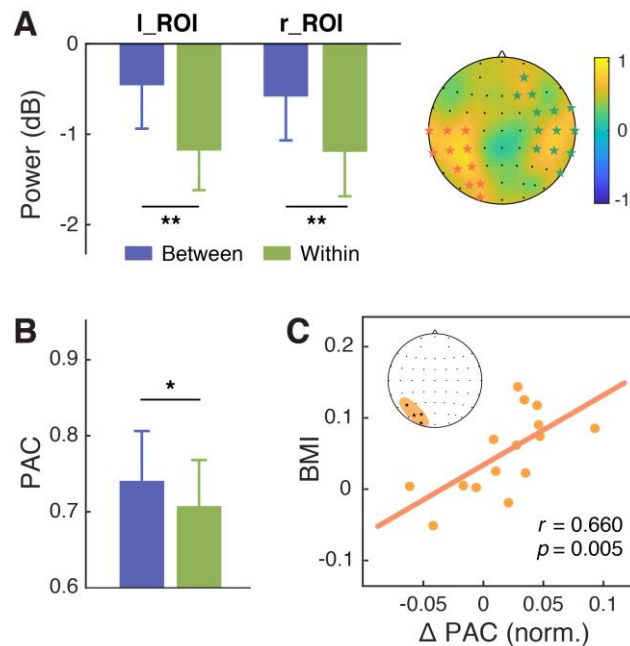

979 **Fig. 5.** Modulation effect of the alpha power and its coupling with the delta phase. (A) T2-  
980 related alpha power averaged within the time window of 0–100 ms relative to the T2  
981 onset was significantly higher in the between-cycle condition than in the within-cycle  
982 condition in a left parieto-occipital cluster (starred in orange) and a right-lateralized  
983 cluster (starred in green). (B) The modulation index of phase-amplitude coupling (PAC)  
984 between the delta and alpha bands was higher for the between-cycle condition than for  
985 the within-cycle condition, and (C) the difference in normalized PAC strength could  
986 predict the BMI across individuals. Shaded area in the topographic plot indicates the  
987 cluster showing significant behavioral relevance in both delta- and alpha-band activities.  
988 Error bars represent 1 SEM; \*  $p < 0.05$ , \*\*  $p < 0.01$ .
